# Supplementary material
Source: MDPI journal article supplement (https://www.mdpi.com/2673-7256/2/2/29)
Supplement: s1 [file s1]

Supplementary Information for:

## **Fluorescence and Phosphorescence of Flavylum Cation Analogues of Anthocyanins**

Gustavo T. M. Silva<sup>1#</sup>, Cassio P. Silva<sup>1#</sup>, Karen M. Silva<sup>1,2</sup>, Renan M. Pioli<sup>1</sup>, Tássia S. Costa<sup>3</sup>, Vinícius V. Marto<sup>3</sup>, Adilson A. Freitas<sup>4</sup>, Jennifer Rozendo<sup>1</sup>, Lucas M. O. S. Martins<sup>1</sup>, Victor F. Cavalcante<sup>1</sup>, Liuqing Sun<sup>5</sup>, Adelia J. A. Aquino<sup>5,6</sup>, Vânia M. T. Carneiro<sup>3</sup> and Frank H. Quina<sup>1\*</sup>

<sup>1</sup> Instituto de Química, Universidade de São Paulo, Avenida Lineu Prestes 748, 05508-900, São Paulo, Brazil.

<sup>2</sup> Instituto Federal de Educação, Ciência e Tecnologia de São Paulo, 01109-010 São Paulo, Brazil.

<sup>3</sup> Departamento de Química, Universidade Federal de Viçosa, Avenida Peter Henry Rolfs s/n, Campus Universitário, 36570-900, Viçosa, Minas Gerais, Brazil.

<sup>4</sup> Instituto Superior Técnico, Universidade de Lisboa, 1049001, Lisbon, Portugal.

<sup>5</sup> School of Pharmaceutical Science and Technology, Tianjin University, Tianjin 300072, People's Republic of China.

<sup>6</sup> Department of Mechanical Engineering, Texas Tech University, Lubbock, TX 79409, USA.

<sup>#</sup> These authors contributed equally

\*Corresponding author:

Frank H. Quina: quina@usp.br

## Characterization data of the new compounds:

### FL-9: 2-(4-iodophenyl)-5,7-dihydroxy-4-methylchromenium chloride

$^1\text{H}$  NMR (500 MHz, Methanol- $d_4$  / 1% TFA-  $d_1$ ):  $\delta$  8.11 – 8.06 (m, 5H), 7.00 (d,  $J$  = 2.2 Hz, 1H), 6.73 (d,  $J$  = 2.2 Hz, 1H).  $^{13}\text{C}$  NMR (126 MHz, Methanol- $d_4$  / 1% DCl):  $\delta$  172.7, 172.2, 168.3, 163.4, 160.5, 140.5, 130.6, 129.8, 117.6, 115.2, 114.7, 104.3, 96.7. HRMS, Calcd for  $\text{C}_{16}\text{H}_{12}\text{O}_3\text{I} [\text{M}-\text{Cl}]^+$  378.9831; Found 378.9832.

### FL10: 2-(4-bromophenyl)-5,7-dihydroxy-4-methylchromenium chloride

$^1\text{H}$  NMR (500 MHz, Methanol- $d_4$  / 1% TFA-  $d_1$ ):  $\delta$  8.26 – 8.23 (m, 2H), 8.11 (s, 1H), 7.89 – 7.86 (m, 2H), 7.00 (d,  $J$  = 2.2 Hz, 1H), 6.73 (d,  $J$  = 2.2 Hz, 1H).  $^{13}\text{C}$  NMR (126 MHz, Methanol- $d_4$  / 1% DCl):  $\delta$  172.8, 172.2, 167.9, 163.4, 160.5, 134.3, 131.3, 131.1, 129.5, 115.4, 114.7, 104.3, 96.7. HRMS, Calcd for  $\text{C}_{16}\text{H}_{12}\text{O}_3\text{Br} [\text{M}-\text{Cl}]^+$  330.9970; Found 330.9970.

### FL14: 2-(3-bromo-4-methoxyphenyl)-7-methoxychromenium chloride

$^1\text{H}$  NMR (500 MHz, Methanol- $d_4$ /TFA)  $\delta$  9.26 (dd,  $J$  = 8.7, 0.8 Hz, 1H), 8.80 (d,  $J$  = 2.4 Hz, 1H), 8.58 (dd,  $J$  = 8.9, 2.4 Hz, 1H), 8.52 (d,  $J$  = 8.7 Hz, 1H), 8.24 (d,  $J$  = 9.0 Hz, 1H), 7.93 (dd,  $J$  = 2.4, 0.8 Hz, 1H), 7.58 (dd,  $J$  = 9.0, 2.4 Hz, 1H), 7.44 (d,  $J$  = 8.9 Hz, 1H), 4.19 (s, 3H), 4.12 (s, 3H).  $^{13}\text{C}$  NMR (126 MHz, Methanol- $d_4$  / 1% DCl):  $\delta$  172.8, 171.4, 164.4, 161.1, 156.0, 135.5, 133.3, 133.1, 123.9, 123.3, 121.5, 114.9, 114.7, 114.5, 101.6, 58.3, 57.9. HRMS, Calcd for  $\text{C}_{17}\text{H}_{14}\text{O}_3\text{Br} [\text{M}-\text{Cl}]^+$  345.0126; Found 345.0130.

### FL-15: 2-(3-bromo-4-methoxyphenyl)-7-hydroxy-4-methylchromenium chloride

$^1\text{H}$  NMR (500 MHz, Methanol- $d_4$ /TFA)  $\delta$  10.25 (d,  $J$  = 2.4 Hz, 1H), 10.05 (dd,  $J$  = 8.9, 2.4 Hz, 1H), 9.93 (s, 1H), 9.91 (d,  $J$  = 9.1 Hz, 1H), 9.08 (d,  $J$  = 2.3 Hz, 1H), 9.01 (dd,  $J$  = 9.2, 2.3 Hz, 1H), 8.95 (d,  $J$  = 8.9 Hz, 1H), 5.65 (s, 3H).  $^{13}\text{C}$  NMR (126 MHz, Methanol- $d_4$ /TFA)  $\delta$  170.5, 170.4, 170.3, 163.8, 160.0, 135.1, 132.3, 130.5, 123.8, 122.6, 120.3, 115.4, 114.5, 114.3, 103.8, 57.8. HRMS, Calcd for  $\text{C}_{16}\text{H}_{12}\text{O}_3\text{Br} [\text{M}-\text{Cl}]^+$  330.9969; Found 330.9970.

### FL-16: 2-(3-bromo-4-methoxyphenyl)-7-methoxy-4-methylchromenium chloride

$^1\text{H}$  NMR (500 MHz, Methanol- $d_4$ /TFA)  $\delta$  10.33 (d,  $J$  = 2.4 Hz, 1H), 10.11 (dd,  $J$  = 8.9, 2.4 Hz, 1H), 10.05 (s, 1H), 9.95 (d,  $J$  = 9.3 Hz, 1H), 9.43 (d,  $J$  = 2.4 Hz, 1H), 9.12 (dd,  $J$  = 9.3, 2.5 Hz, 1H), 8.98 (d,  $J$  = 8.9 Hz, 1H), 5.73 (s, 3H), 5.67 (s, 3H).  $^{13}\text{C}$  NMR (126 MHz, Methanol- $d_4$ /TFA)  $\delta$  170.9, 170.8, 170.7, 164.1, 160.0, 135.3, 132.6, 129.7, 123.7, 122.7, 121.0, 116.2, 114.6, 114.4, 101.7, 58.0, 57.8. HRMS, Calcd for  $\text{C}_{18}\text{H}_{16}\text{O}_3\text{Br} [\text{M}-\text{Cl}]^+$  359.0283; Found 359.0283.

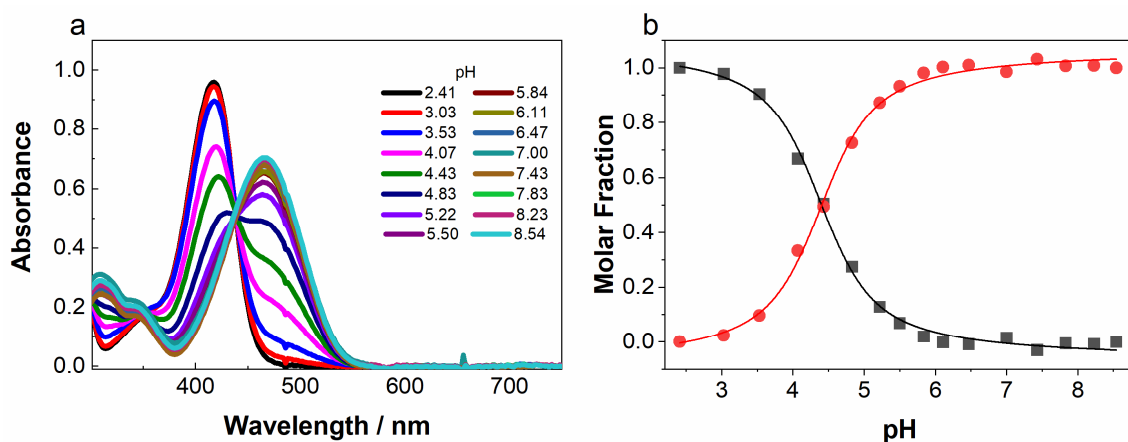

**Figure S1.** Determination of the  $pK_a$  of **FL2**: (a) spectral changes as a function of pH within 5 s; (b) decrease in the fraction of  $AH^+$  (black) and increase in **A** (red).

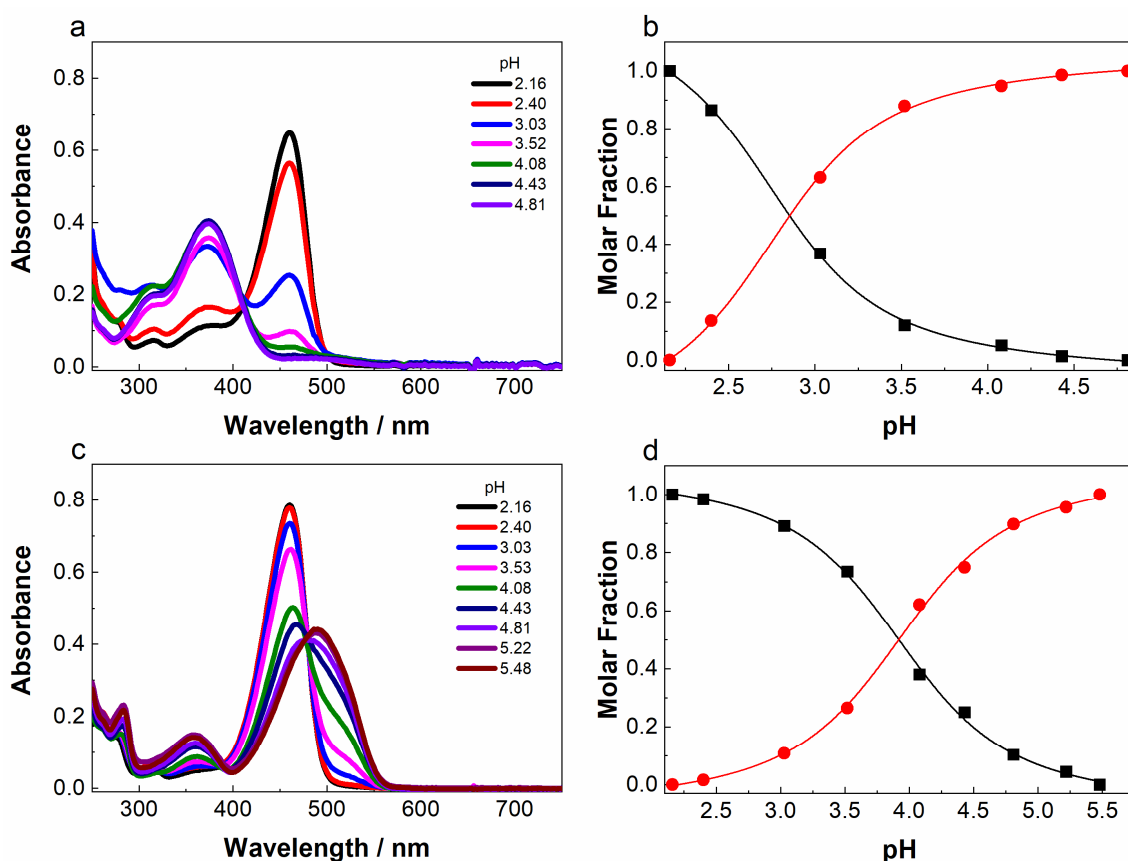

**Figure S2.** Determination of the  $pK_{ap}$  of **FL3**: (a) spectral changes as a function of pH after 24 h; (b) decrease in the fraction of  $AH^+$  (black) and increase in the other forms (red). Determination of the  $pK_a$  of **FL3**: (c) spectral changes as a function of pH within 5 s; (d) decrease in the fraction of  $AH^+$  (black) and increase in **A** (red).

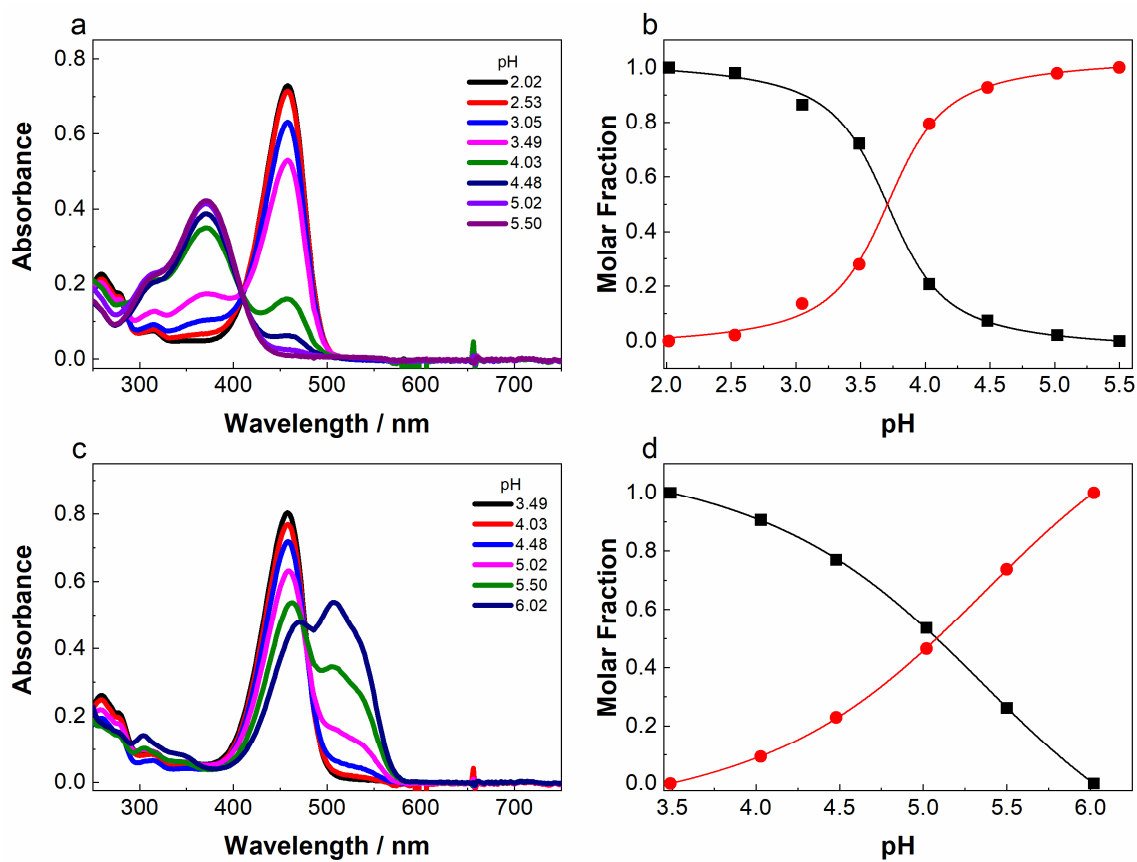

**Figure S3.** Determination of the pK<sub>ap</sub> of FL4: (a) spectral changes as a function of pH after 24 h; (b) decrease in the fraction of AH<sup>+</sup> (black) and increase in the other forms (red). Determination of the pK<sub>a</sub> of FL4: (c) spectral changes as a function of pH within 5 s; (d) decrease in the fraction of AH<sup>+</sup> (black) and increase in A (red).

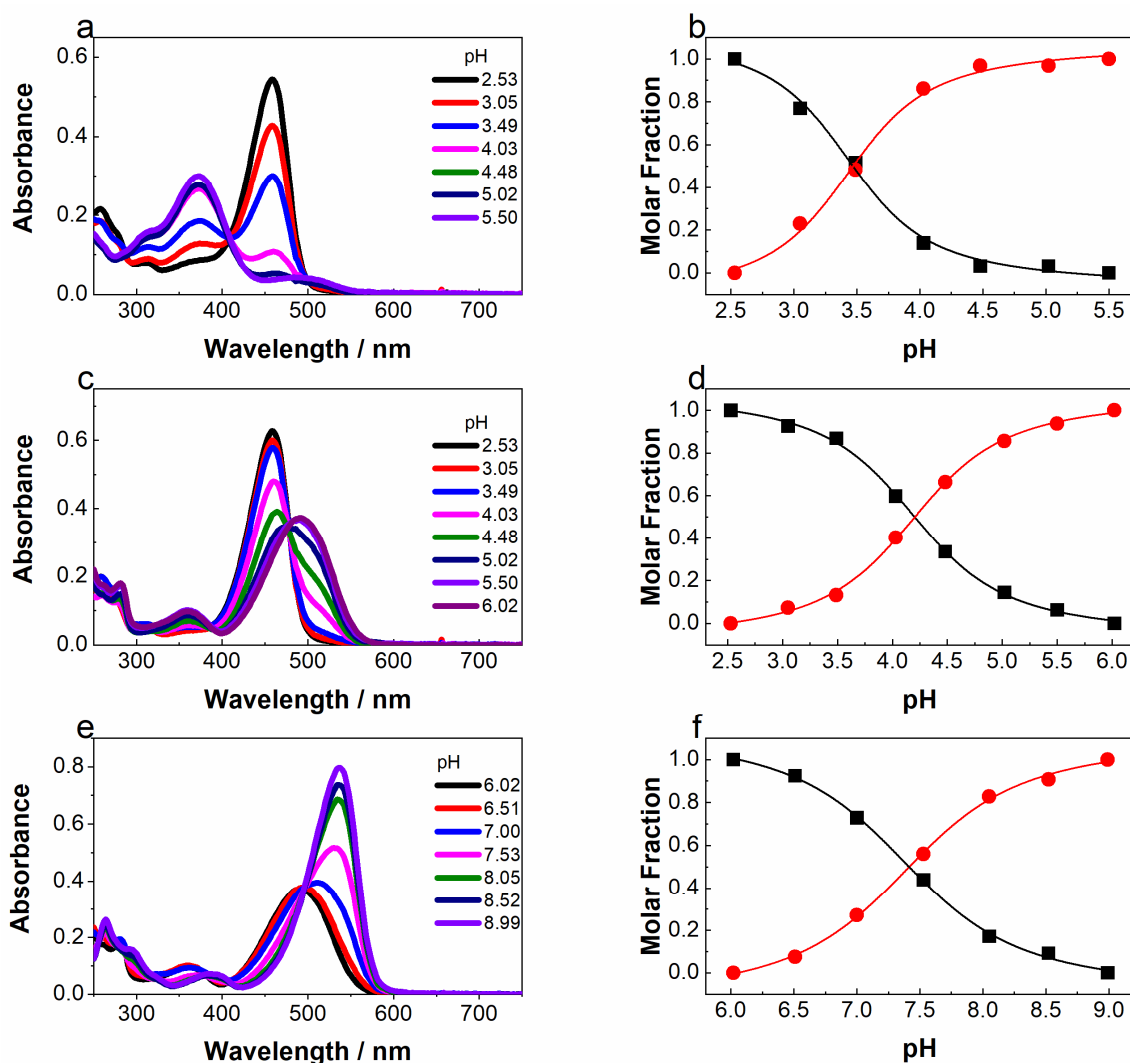

**Figure S4.** Determination of the  $pK_{ap}$  of **FL5**: (a) spectral changes as a function of pH after 24 h; (b) decrease in the fraction of  $AH^+$  (black) and increase in the other forms (red). Determination of the first and second  $pK_a$ s of **FL4**: (c,e) spectral changes as a function of pH within 5 s; (d) decrease in the fraction of  $AH^+$  (black) and increase in **A** (red); (f) decrease in the fraction of **A** (black) and increase in  $A^-$  (red).

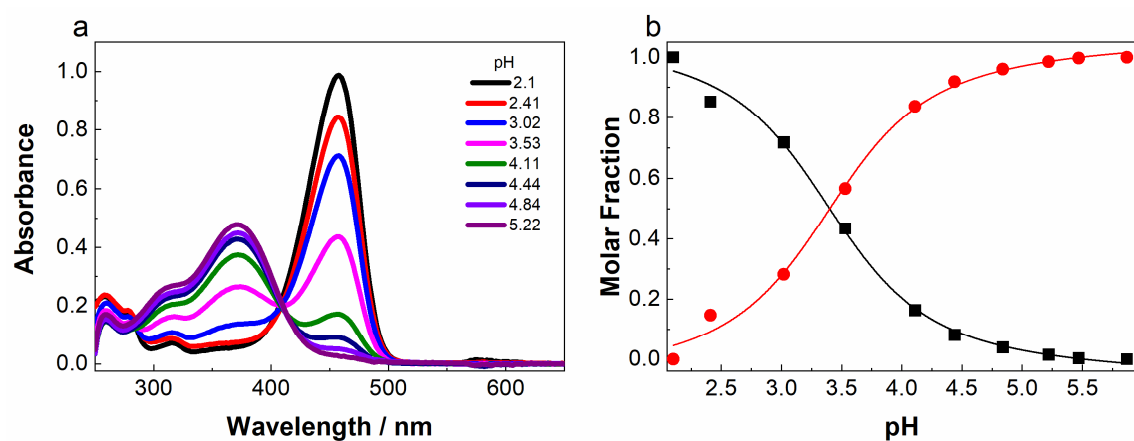

**Figure S5.** Determination of the  $pK_{ap}$  of FL6: (a) spectral changes as a function of pH after 24 h; (b) decrease in the fraction of  $AH^+$  (black) and increase in the other forms (red).

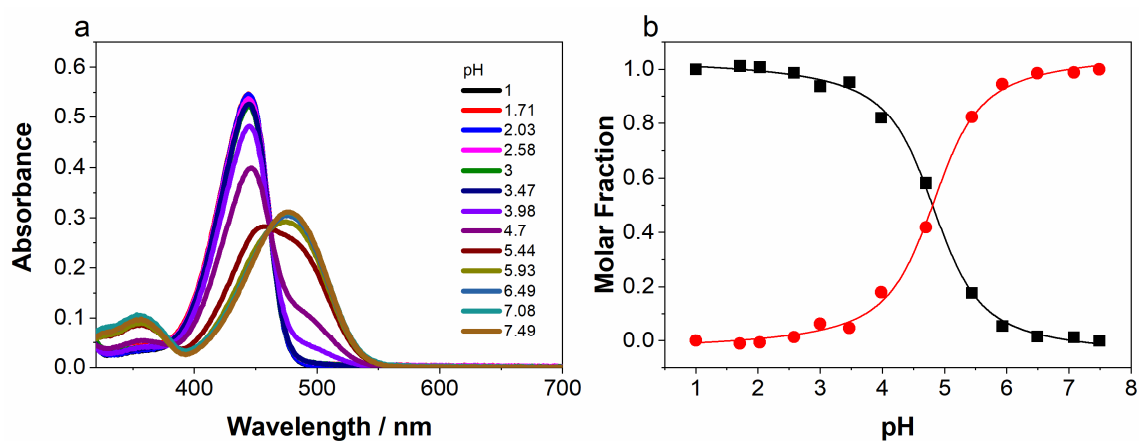

**Figure S6.** Determination of the  $pK_a$  of FL7: (a) spectral changes as a function of pH within 5 s; (b) decrease in the fraction of  $AH^+$  (black) and increase in A (red).

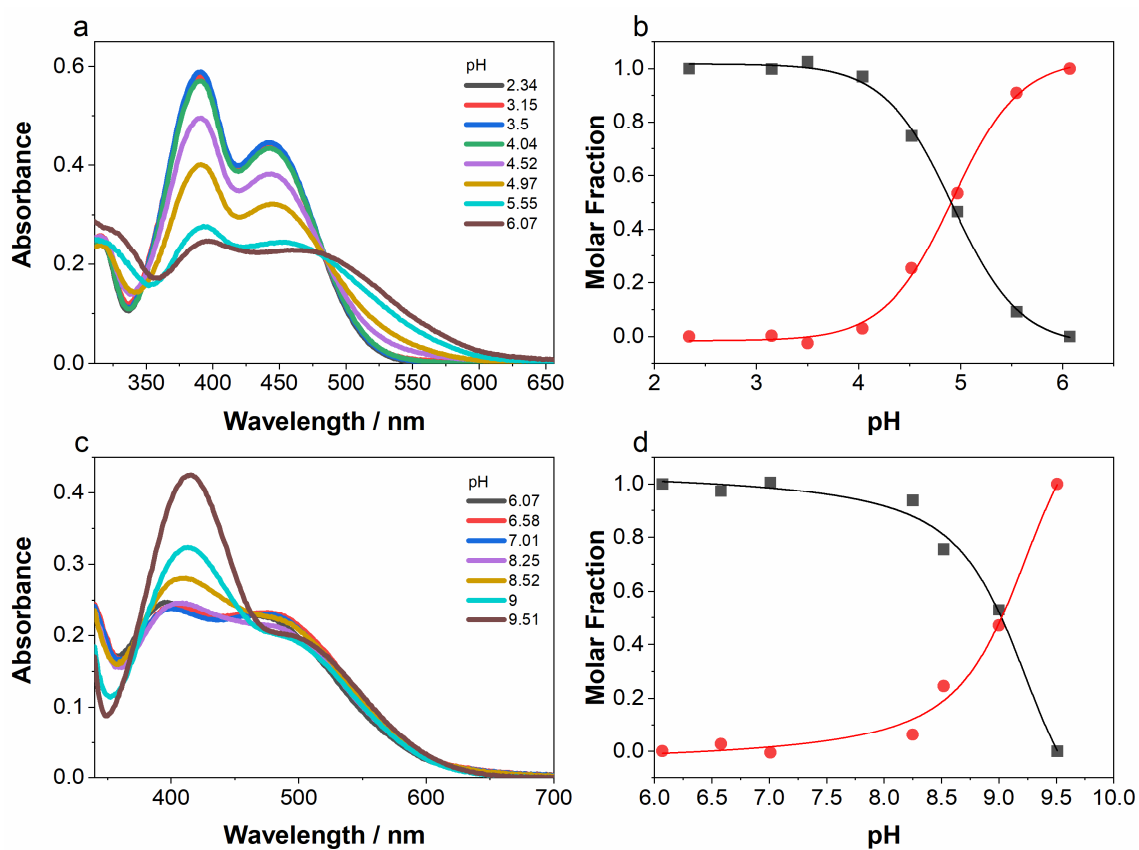

**Figure S7.** Determination of the first and second pK<sub>a</sub>s of FL9: (a,c) spectral changes as a function of pH within 5 s; (b) decrease in the fraction of AH<sup>+</sup> (black) and increase in A (red); (d) decrease in the fraction of A (black) and increase in A<sup>-</sup> (red).

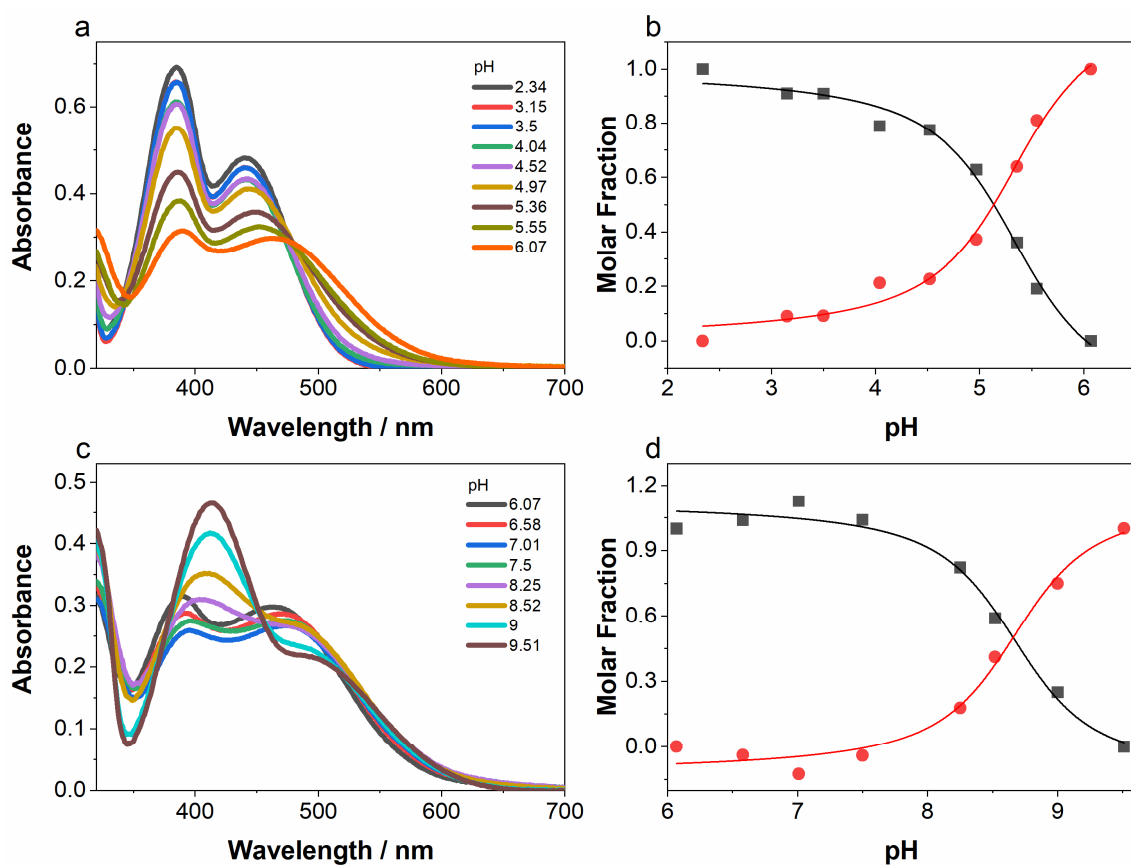

**Figure S8.** Determination of the first and second pK<sub>a</sub>s of **FL10**: (a,c) spectral changes as a function of pH within 5 s; (b) decrease in the fraction of **AH<sup>+</sup>** (black) and increase in **A** (red); (d) decrease in the fraction of **A** (black) and increase in **A<sup>-</sup>** (red).



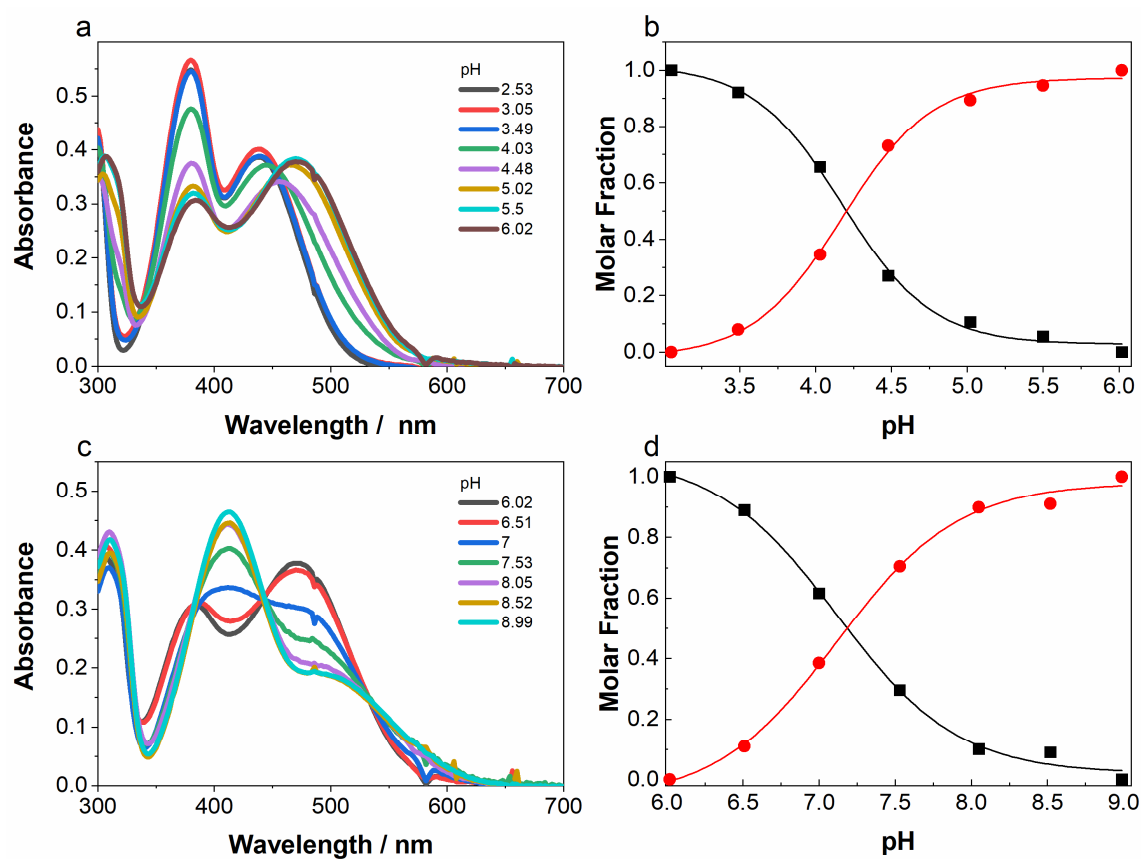

**Figure S9.** Determination of the first and second pK<sub>a</sub>s of **FL11**: (a,c) spectral changes as a function of pH within 5 s; (b) decrease in the fraction of **AH<sup>+</sup>** (black) and increase in **A** (red); (d) decrease in the fraction of **A** (black) and increase in **A<sup>-</sup>** (red).

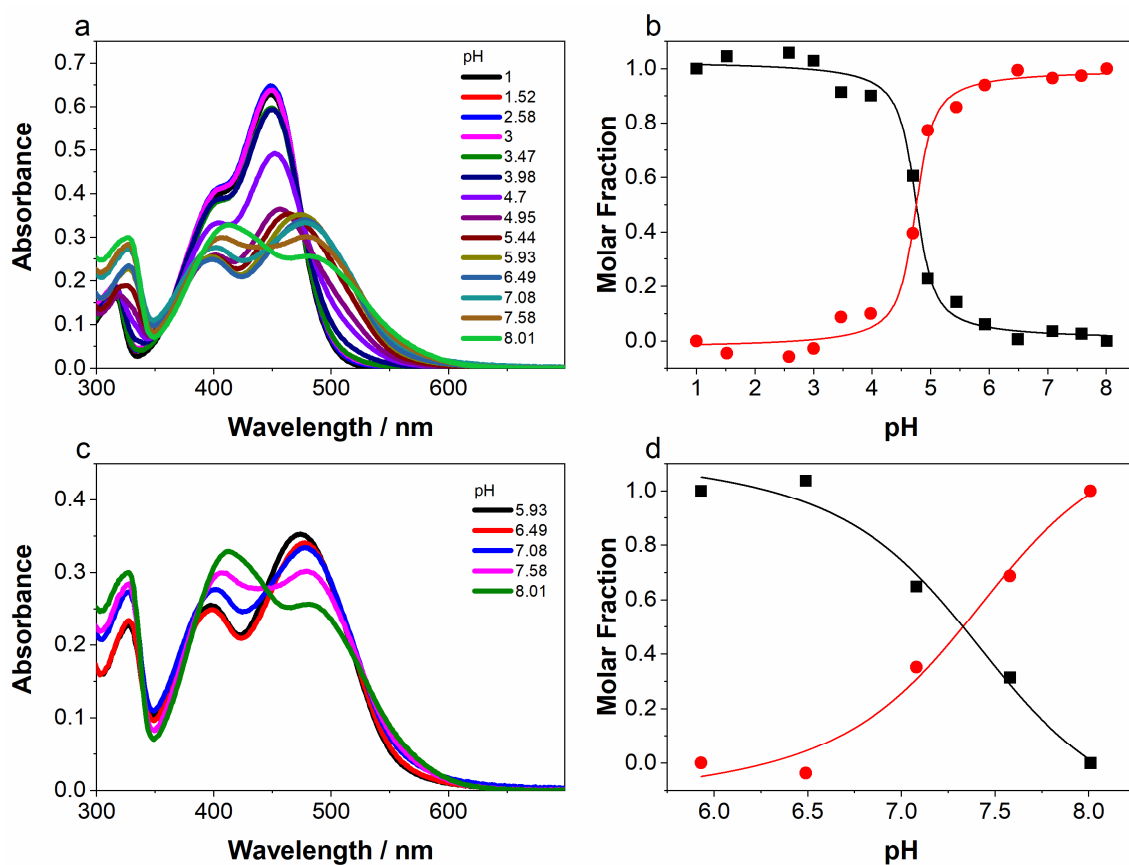

**Figure S10.** Determination of the first and second  $pK_a$ s of FL12: (a,c) spectral changes as a function of pH within 5 s; (b) decrease in the fraction of  $AH^+$  (black) and increase in  $A$  (red); (d) decrease in the fraction of  $A$  (black) and increase in  $A^-$  (red).

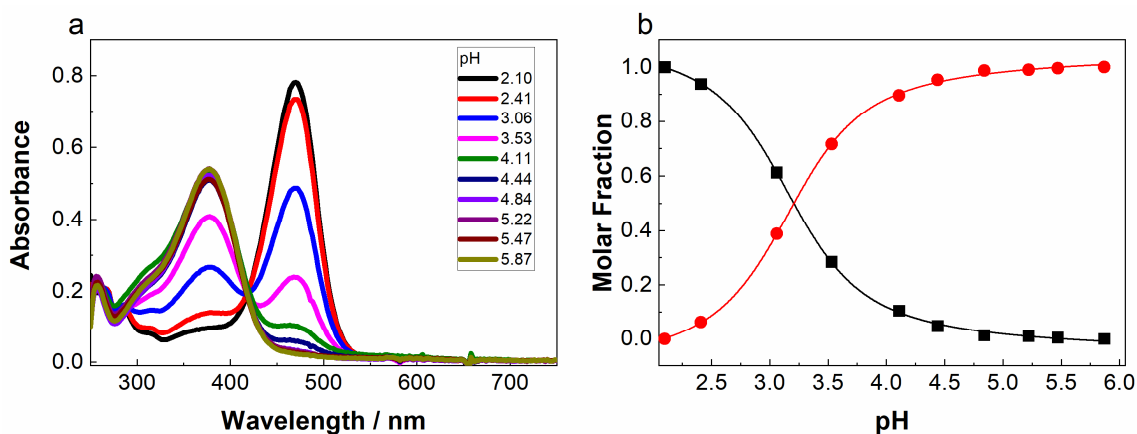

**Figure S11.** Determination of the  $pK_{ap}$  of FL13: (a) spectral changes as a function of pH after 24 h; (b) decrease in the fraction of  $AH^+$  (black) and increase in the other forms (red).

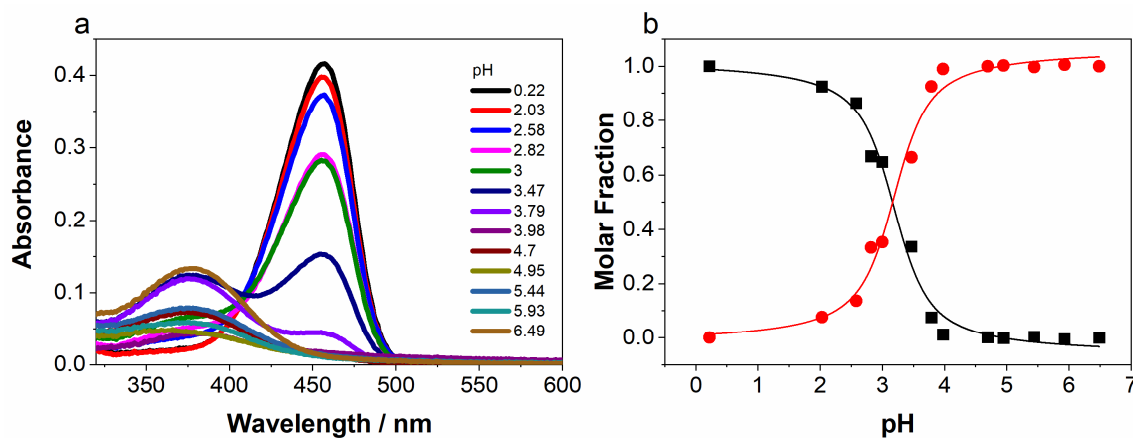

**Figure S12.** Determination of the  $pK_{ap}$  of FL14: (a) spectral changes as a function of pH after 24 h; (b) decrease in the fraction of  $AH^+$  (black) and increase in the other forms (red).

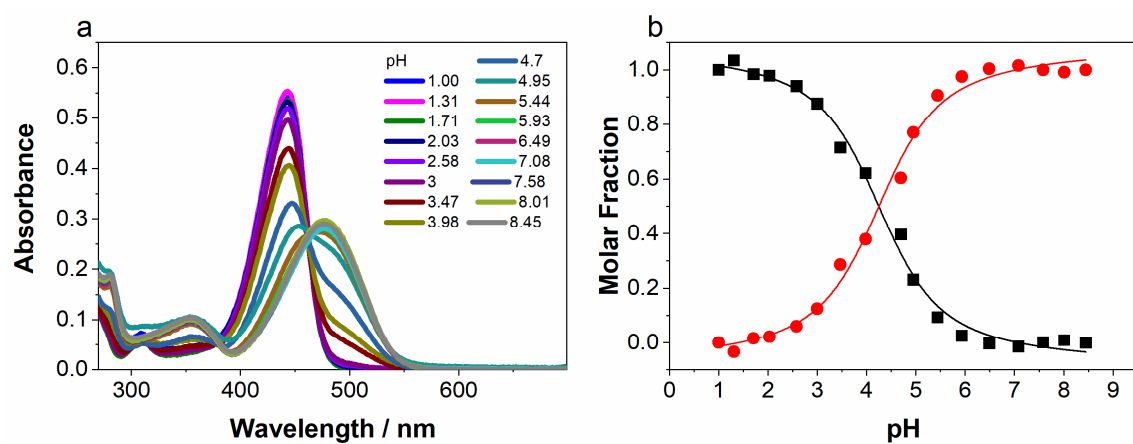

**Figure S13.** Determination of the  $pK_a$  of FL15: (a) spectral changes as a function of pH within 5 s; (b) decrease in the fraction of  $AH^+$  (black) and increase in A (red).

**Table S1.** Vertical excitation energies  $E$  (in eV and in nm), oscillator strength  $f$  and the charge transfer character  $q(\text{CT})$  (in units of e) by ADC(2)/def2-TZVP in the gas phase and in COSMO acetonitrile of the five lowest energy excited singlet states of selected flavylum cations.

| System | Excited state  | Gas Phase             |             |                | Acetonitrile          |             |                |
|--------|----------------|-----------------------|-------------|----------------|-----------------------|-------------|----------------|
|        |                | $\Delta E$<br>(eV/nm) | $f$         | $q(\text{CT})$ | $\Delta E$<br>(eV/nm) | $f$         | $q(\text{CT})$ |
| FL6    | S <sub>1</sub> | <b>2.62/474</b>       | <b>0.85</b> | <b>0.48</b>    | <b>2.67/465</b>       | <b>0.87</b> | <b>0.42</b>    |
|        | S <sub>2</sub> | 3.31/374              | 0.02        | 0.31           | 3.34/371              | 0.03        | 0.31           |
|        | S <sub>3</sub> | 3.94/315              | 0.00        | <b>0.63</b>    | 3.99/311              | 0.00        | <b>0.60</b>    |
|        | S <sub>4</sub> | 4.16/298              | 0.05        | 0.29           | 4.18/297              | 0.08        | 0.35           |
|        | S <sub>5</sub> | 4.64/267              | 0.06        | 0.44           | 4.76/261              | 0.06        | 0.37           |
| FL8    | S <sub>1</sub> | <b>2.67/464</b>       | <b>0.82</b> | <b>0.46</b>    | <b>2.73/455</b>       | <b>0.84</b> | <b>0.45</b>    |
|        | S <sub>2</sub> | 3.34/371              | 0.03        | 0.34           | 3.37/368              | 0.04        | 0.33           |
|        | S <sub>3</sub> | 3.97/312              | 0.00        | <b>0.62</b>    | 4.06/306              | 0.02        | <b>0.51</b>    |
|        | S <sub>4</sub> | 4.16/298              | 0.07        | 0.30           | 4.18/297              | 0.10        | 0.38           |
|        | S <sub>5</sub> | 4.69/264              | 0.05        | 0.46           | 4.80/258              | 0.05        | 0.36           |
| FL12   | S <sub>1</sub> | <b>2.67/464</b>       | <b>0.75</b> | <b>0.46</b>    | <b>2.74/452</b>       | <b>0.73</b> | <b>0.41</b>    |
|        | S <sub>2</sub> | 3.03/409              | 0.04        | 0.30           | 3.09/402              | 0.09        | 0.33           |
|        | S <sub>3</sub> | 3.91/317              | 0.04        | 0.39           | 4.00/310              | 0.09        | 0.33           |
|        | S <sub>4</sub> | 3.97/312              | 0.04        | <b>0.58</b>    | 4.02/308              | 0.02        | <b>0.62</b>    |
|        | S <sub>5</sub> | 4.63/268              | 0.05        | 0.42           | 4.71/263              | 0.18        | 0.21           |
| FL16   | S <sub>1</sub> | <b>2.62/473</b>       | <b>0.75</b> | <b>0.53</b>    | <b>2.75/451</b>       | <b>0.80</b> | <b>0.42</b>    |
|        | S <sub>2</sub> | 3.29/377              | 0.01        | 0.35           | 3.37/368              | 0.04        | 0.34           |
|        | S <sub>3</sub> | 3.59/345              | 0.05        | <b>0.63</b>    | 3.85/322              | 0.01        | <b>0.51</b>    |
|        | S <sub>4</sub> | 4.15/299              | 0.07        | 0.29           | 4.19/296              | 0.12        | 0.37           |
|        | S <sub>5</sub> | 4.54/273              | 0.02        | <b>0.51</b>    | 4.72/263              | 0.01        | 0.39           |
| FL13   | S <sub>1</sub> | <b>2.44/508</b>       | <b>0.67</b> | <b>0.55</b>    | <b>2.62/474</b>       | <b>0.85</b> | <b>0.45</b>    |
|        | S <sub>2</sub> | 3.10/400              | 0.10        | 0.48           | 3.30/376              | 0.02        | 0.36           |
|        | S <sub>3</sub> | 3.38/367              | 0.06        | 0.46           | 3.69/336              | 0.01        | <b>0.60</b>    |
|        | S <sub>4</sub> | 4.14/300              | 0.04        | 0.29           | 4.16/298              | 0.08        | 0.34           |
|        | S <sub>5</sub> | 4.45/279              | 0.00        | <b>0.58</b>    | 4.33/286              | 0.00        | <b>0.62</b>    |

**Table S2.** ADC(2)/def2-TZVP vertical absorption and adiabatic and vertical fluorescence emission energies (eV) for the  $S_1$  state and changes in the Ring-B/Ring-C dihedral angle between  $S_0$  and  $S_1$  in the gas phase

| Flavylum<br>Cation | Vertical<br>absorption<br>(eV/nm) | Adiabatic<br>(eV/nm) | Vertical<br>fluorescence<br>emission<br>(eV/nm) | Ring-B/Ring-C<br>Dihedral angle<br>in $S_0$<br>(degrees) | Increase of the<br>Ring-B/Ring-C<br>Dihedral angle<br>in $S_1$ (degrees) |
|--------------------|-----------------------------------|----------------------|-------------------------------------------------|----------------------------------------------------------|--------------------------------------------------------------------------|
| FL6                | 2.62/473                          | 2.52/492             | 2.41/515                                        | 2.0                                                      | 0.3                                                                      |
| FL8                | 2.67/464                          | 2.57/482             | 2.47/502                                        | 2.6                                                      | 0.3                                                                      |
| FL12               | 2.67/464                          | 2.46/504             | 1.95/636                                        | 12.8                                                     | 7.7                                                                      |
| FL16               | 2.62/473                          | 2.51/492             | 2.39/519                                        | 1.5                                                      | 0.2                                                                      |
| FL13               | 2.44/508                          | 2.05/605             | 1.66/747                                        | 1.0                                                      | 30                                                                       |
